## AN ALL-OR-NOTHING RISE IN CYTOSOLIC $[Ca^{2+}]$ IN *VORTICELLA* SP.

KAORU KATO<sup>1,2,\*</sup> AND MUNEHITO KIKUYAMA<sup>1</sup>

<sup>1</sup>*Biological Laboratory, University of the Air, Wakaba, Mihama-ku, Chiba City 261, Japan and*

<sup>2</sup>*Institute of Biological Science, University of Tsukuba, Tsukuba, Ibaraki 305, Japan*

Accepted 15 October 1996

### Summary

The peritrich ciliate *Vorticella* sp. exhibits cellular contraction of an all-or-nothing type in response to a mechanical stimulus. Many authors have suggested that the contraction may be controlled by the cytosolic level of  $Ca^{2+}$ , since glycerol-extracted *Vorticella* contracts when  $Ca^{2+}$  is added to the external solution. However, no direct evidence for the increase in cytosolic  $[Ca^{2+}]$  has yet been obtained in living *Vorticella*.

In the present study, by injecting a fluorescent  $Ca^{2+}$  indicator into living *Vorticella* and monitoring the cytosolic  $[Ca^{2+}]$  with a confocal microscope, we have demonstrated

that a mechanical stimulus evoked an all-or-nothing rise in cytosolic  $[Ca^{2+}]$  ( $Ca^{2+}$  'spike'). The onset of the  $Ca^{2+}$  spike was similar in its time course to that of cellular contraction. Since the  $Ca^{2+}$  spike was recorded in a  $Ca^{2+}$ -deprived solution containing  $1\text{ mmol l}^{-1}$  EGTA, we concluded that release of  $Ca^{2+}$  from intracellular  $Ca^{2+}$  storage site(s) is responsible for the  $Ca^{2+}$  spike.

Key words: *Vorticella* sp., contraction,  $Ca^{2+}$  transient,  $Ca^{2+}$  concentration.

### Introduction

The peritrich ciliate *Vorticella* sp. exhibits contraction of an all-or-nothing type involving shrinkage of the cell body and coiling of the stalk in response to mechanical stimulation (Sugi, 1960). As early as 1958, Hoffmann-Berling found that the stalk of glycerol-extracted *Vorticella* contracted when  $Ca^{2+}$  was added to the external solution and relaxed when  $Ca^{2+}$  was removed (see also Amos, 1971). Many authors later examined the  $Ca^{2+}$ -dependent contraction in glycerol-extracted *Vorticella* in detail and reported that the degree of contraction depended on the  $Ca^{2+}$  concentration ( $[Ca^{2+}]$ ) in the reactivation medium (Townes and Brown, 1965; Weis-Fogh and Amos, 1972; Routledge *et al.* 1975; Ochiai *et al.* 1979). A  $Ca^{2+}$ -binding protein, spasmin, was extracted from contractile elements of *Zoothamnium geniculatum*, a close relative of *Vorticella* (Amos *et al.* 1975; Ochiai *et al.* 1988). These findings suggest that an increase in cytosolic  $[Ca^{2+}]$  may activate the contractile system of *Vorticella* (Amos *et al.* 1976).

Several authors assumed that the  $Ca^{2+}$  required to activate the contractile system is released from intracellular  $Ca^{2+}$  storage site(s) in *Vorticella*, for living *Vorticella* can contract even in  $Ca^{2+}$ -deprived media containing EGTA (Allen, 1973a; Katoh and Naitoh, 1992, 1994). Electron microscopic studies of vorticellid ciliates showed that membranous tubules (tubular endoplasmic reticulum) are present in the spasmoneme, which is responsible for coiling of the stalk, and in the myoneme,

which is responsible for shrinkage of the cell body. These studies also showed that endoplasmic reticulum is present around the myoneme (Carasso and Favard, 1966; Amos, 1972; Allen, 1973a,b). Moreover, Carasso and Favard (1966) demonstrated the presence of  $Ca^{2+}$  in the tubules and endoplasmic reticulum using cytochemical methods. These membranous systems are candidates for the  $Ca^{2+}$  storage sites.

Recently, cytosolic  $[Ca^{2+}]$  has been monitored in various cells using AM esters of fluorescent  $Ca^{2+}$  indicators, which permeate the cell membrane of higher animals. However, in protozoan cells, it is difficult to measure cytosolic  $Ca^{2+}$  levels, because their cell membrane is less permeable to the AM ester. In some protozoans other than *Vorticella*, researchers have detected an increase in cytosolic  $[Ca^{2+}]$ ; for example, in *Spirostomum ambiguum* (Ettienne, 1970) and in *Didinium nasutum* (Pernberg and Machemer, 1995). However, no one has observed a rise in cytosolic  $[Ca^{2+}]$  in living *Vorticella*, in which it has been well established, in glycerol-extracted cell models, that the contractile system is activated by  $Ca^{2+}$ .

The primary objective of the research described in this paper was to detect a rise in the cytosolic  $[Ca^{2+}]$  of living *Vorticella*. Under a confocal microscope, we observed the cytosolic  $[Ca^{2+}]$  of living *Vorticella* loaded with a fluorescent  $Ca^{2+}$  indicator and demonstrated an all-or-nothing rise in cytosolic  $[Ca^{2+}]$  ( $Ca^{2+}$  spike). Some of these results have been presented verbally elsewhere (Katoh, 1995; Katoh and Kikuyama, 1996).

\*Present address: Architectural Dynamics in Living Cells Program, Marine Biological Laboratory, Woods Hole, MA 02453, USA (e-mail: kkatoh@mbl.edu).

### Materials and methods

Specimens of *Vorticella* sp. were grown at 20 °C on a glass slide in a bacterized saline solution (final concentrations 0.1 mmol l<sup>-1</sup> KCl, 0.09 mmol l<sup>-1</sup> CaCl<sub>2</sub> and 0.1 mmol l<sup>-1</sup> MgSO<sub>4</sub>) containing 0.1% (w/w) dehydrated cereal leaves (Sigma). Specimens were washed with a standard saline solution containing 1 mmol l<sup>-1</sup> KCl, 1 mmol l<sup>-1</sup> CaCl<sub>2</sub> and 10 mmol l<sup>-1</sup> Tris-maleate buffer (pH 7.0) and then immersed in a Ca<sup>2+</sup>-deprived solution for approximately 10 min prior to each experiment. The Ca<sup>2+</sup>-deprived solution was a mixture of 1 mmol l<sup>-1</sup> KCl, 1 mmol l<sup>-1</sup> EGTA and 10 mmol l<sup>-1</sup> Tris-maleate buffer (pH 7.0).

In order to monitor the cytosolic [Ca<sup>2+</sup>] of *Vorticella*, a Calcium Green solution was injected into the cell body according to the method of Hiramoto (1974). The distal end of the stalk of a specimen was first detached from its substratum (a glass slide) and the cell body was fixed at the tip of a suction pipette (approximately 5 μm in inner diameter) by lowering the hydrostatic pressure inside the pipette. The tip of a microneedle (about 1 μm in inner diameter) for injection was then inserted into the cell body. The Calcium Green solution contained 1 μmol l<sup>-1</sup> Calcium Green-1 dextran (*M<sub>r</sub>* 10 000, Molecular Probes, Inc., Eugene, USA), 150 mmol l<sup>-1</sup> KCl and 1 mmol l<sup>-1</sup> Pipes (pH 7.0, adjusted using KOH). The amount of solution injected into the cell body was 0.7–1 pl, which corresponded to 2–3% of the volume of the cell body. Thus, the final concentration of Calcium Green-1 dextran contained in the cytoplasm was approximately 20–30 nmol l<sup>-1</sup>.

A mechanical stimulus was applied to the cell body with a microneedle. The microneedle was driven perpendicularly by a piezoelectric transducer according to the method of Katoh and Naitoh (1992) (see also Naitoh and Eckert, 1969). The amplitude of the motion was represented as the amplitude of a rectangular voltage pulse (2–10 V) applied to the piezoelectric transducer attached to the microneedle (Fig. 1). The tip of the microneedle moved approximately 0.15 μm in response to a

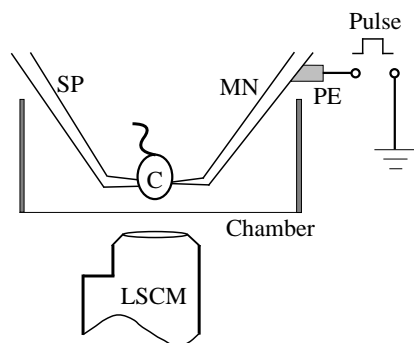

Fig. 1. Schematic view of the experimental arrangement. A cell of *Vorticella* sp. (C) detached from the substratum was fixed with a suction pipette (SP) in an experimental chamber. A mechanical stimulus was applied to the cell body by a microneedle (MN) driven by a piezoelectric transducer (PE) according to the method of Katoh and Naitoh (1992). LSCM, laser scanning confocal microscope.

rectangular electrical pulse of 5 V. The duration of the electrical pulse was constant (15 ms).

An inverted microscope (TMD, Nikon, Tokyo) equipped with a laser confocal scanner unit (Insight Plus-IQ, Meridian Instruments Far East, Inc., Tokyo) was used with excitation at a wavelength of 488 nm (Fig. 1). The magnified image of the specimen was recorded with a video recorder (BR-S811, Victor, Tokyo) through a CCD camera (HCC-600M, Flouel, Tokyo). The recorded images were transferred to a computer (Apple Macintosh 7100) and analyzed. Relative cytosolic [Ca<sup>2+</sup>] was expressed as  $F/F_0$ , where  $F$  is the intensity of fluorescence and  $F_0$  is the mean value of  $F$  of the cell body immediately before stimulation. All experiments were performed at room temperature (20–23 °C).

### Results

#### *Transient rise in cytosolic [Ca<sup>2+</sup>]*

Before the experiments, the fluorescent Ca<sup>2+</sup> indicator (Calcium Green-1 dextran) was injected into a specimen bathed in a Ca<sup>2+</sup>-deprived solution. Although the injection of the Ca<sup>2+</sup> indicator often caused a contraction of *Vorticella*, the specimen soon relaxed and resumed ciliary beating within 1 min. All experiments were carried out on specimens in this state.

We observed relative cytosolic [Ca<sup>2+</sup>] ( $F/F_0$ ) in a cell body of *Vorticella* before, during and after applying a mechanical stimulus to the cell body. The mechanical stimulus evoked a transient rise in cytosolic [Ca<sup>2+</sup>]. Fig. 2 shows representative images of this transient rise. The cytosolic [Ca<sup>2+</sup>] increased rapidly and then slowly returned to the resting level.

To determine the precise time course of the Ca<sup>2+</sup> transient, [Ca<sup>2+</sup>] in the cell body was plotted against time (Fig. 3). When a mechanical stimulus was applied to the cell body, cytosolic [Ca<sup>2+</sup>] increased rapidly and then gradually returned to the initial level. The latency between the stimulus and the onset of the Ca<sup>2+</sup> transient was 43 ± 10 ms (mean ± S.E.M.,  $N=12$ ) and the rise time of the Ca<sup>2+</sup> transient was 92 ± 10 ms (mean ± S.E.M.,  $N=12$ ).

#### *Relationship between the Ca<sup>2+</sup> spike and contraction of the cell body*

To determine the temporal relationship between the Ca<sup>2+</sup> transient and contraction of the cell body, we compared the onset of the Ca<sup>2+</sup> transient with that of contraction in the same specimen injected with Calcium Green. First, under a light microscope, we recorded the contraction evoked by a mechanical stimulus. We then switched the optical pathway to a laser scanning confocal microscope and recorded the Ca<sup>2+</sup> transient evoked by mechanical stimulus in the same cell. Since the cell body of *Vorticella* was fixed with a suction pipette and a microneedle, the degree of contraction was smaller than that in normal specimens attached to a substratum by the stalk (see Fig. 4B). We compared the time course of the small contraction with that of the Ca<sup>2+</sup> transient.

Fig. 4 shows representative examples of contraction and of

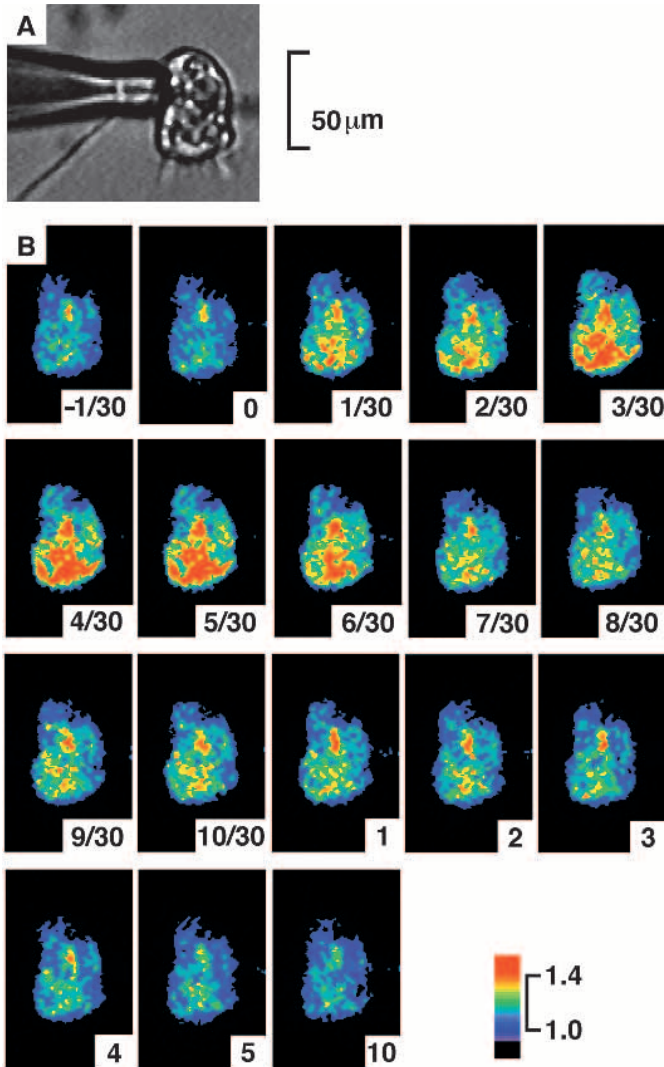

Fig. 2. Cytosolic  $[Ca^{2+}]$  before, during and after mechanical stimulation. (A) A cell of *Vorticella* sp. used for the measurements. (B) Cytosolic  $[Ca^{2+}]$  expressed as pseudo-colour images. Cytosolic  $[Ca^{2+}]$  is expressed as a relative value,  $F/F_0$ , where  $F$  is the intensity of fluorescence of the  $Ca^{2+}$  indicator and  $F_0$  is the mean value of  $F$  immediately before stimulation. Each number in each image shows the time (in s) after application of the mechanical stimulus to the cell body. The image with the number  $-1/30$  is just before stimulation. At time 0, a mechanical stimulus was applied to the cell body with a microneedle. The microneedle was moved perpendicularly (less than  $0.15\mu m$ ) against the cell surface by a piezoelectric transducer driven by an electrical pulse (amplitude 5 V; duration 15 ms). The displacement of the microneedle was so small that no movement of the microneedle was detected in the video images. A result typical of 12 specimens.

the  $Ca^{2+}$  transient in Calcium-Green-injected *Vorticella*. Both were evoked by mechanical stimuli with the same intensity (3 V). Contraction occurred one frame after the stimulation in Fig. 4B, and the  $Ca^{2+}$  transient also occurred one frame after the stimulation in Fig. 4A. The onset of contraction was similar in its time course to that of the  $Ca^{2+}$  transient. Moreover, the threshold intensity of the mechanical stimulus required to

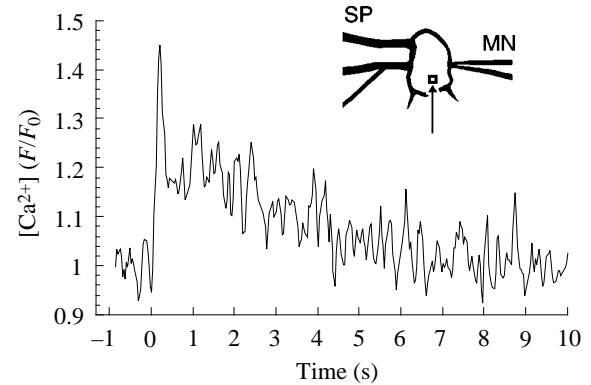

Fig. 3. Time course of the transient rise in cytosolic  $[Ca^{2+}]$ . At time 0, a mechanical stimulus was applied to a *Vorticella* cell. Cytosolic  $[Ca^{2+}]$  is defined in the same way as in Fig. 2. A result typical of 12 specimens. Inset, the position within the cell of the area in which cytosolic  $[Ca^{2+}]$  was measured (shown with an arrow). SP, suction pipette; MN, microneedle. Stimulus intensity, 5 V.

evoke contraction ( $2.9\pm 0.2$  V,  $N=5$ ) was similar to that required to evoke the  $Ca^{2+}$  transient ( $3.2\pm 0.2$  V,  $N=5$ ).

#### Relationship between stimulus intensity and cytosolic $[Ca^{2+}]$

To examine the relationship between the intensities of mechanical stimuli and cytosolic  $[Ca^{2+}]$ , we applied mechanical stimuli with different intensities to a *Vorticella* cell and measured cytosolic  $[Ca^{2+}]$ . Fig. 5 shows representative examples of responses of cytosolic  $[Ca^{2+}]$  to mechanical stimuli of different intensities. The  $Ca^{2+}$  images shown in Fig. 5 were recorded from the same specimen. No rise in cytosolic  $[Ca^{2+}]$  was evoked when the intensity of the mechanical stimulus was lower than 2 V (Fig. 5B). When the intensity was 3 V or more, a transient rise in cytosolic  $[Ca^{2+}]$  was evoked (Fig. 5C,D). The spatial pattern of the rise in cytosolic  $[Ca^{2+}]$  was similar irrespective of the intensity of the mechanical stimulus provided that the intensity was over the threshold level (3 V, in Fig. 5) for evoking the  $Ca^{2+}$  transient (compare Fig. 5C with Fig. 5D).

To determine the effect of the intensity of the mechanical stimulus on the time course of the  $Ca^{2+}$  transients, cytosolic  $[Ca^{2+}]$  was plotted against time (Fig. 6). A rise in cytosolic  $[Ca^{2+}]$  was observed when the intensity of the mechanical stimulus was 3 V or more, as was expected from the  $Ca^{2+}$  images in Fig. 5. The form of the  $Ca^{2+}$  transient, a fast rising phase followed by a slow falling phase, was consistent irrespective of the intensity of the mechanical stimulus (compare Fig. 6B with Fig. 6C).

In the next series of experiments, the relationship between the peak level of the  $Ca^{2+}$  transient and the intensity of the mechanical stimulus was examined more precisely (Fig. 7). The peak level was constant irrespective of the intensity of the mechanical stimulus provided that the intensity was above a certain threshold level (3 V). This clearly shows that the  $Ca^{2+}$  transient is of an all-or-nothing type.

Fig. 4. Comparison between the time of onset of the  $\text{Ca}^{2+}$  transient and of contraction in the same specimen. Times after applying the mechanical stimulus are labelled (in s) under each image. At time 0, a mechanical stimulus was applied to a *Vorticella* cell. Cytosolic  $[\text{Ca}^{2+}]$  is defined in the same way as in Fig. 2. (A) Cytosolic  $[\text{Ca}^{2+}]$ ; (B) cellular contraction. A result typical of five specimens.

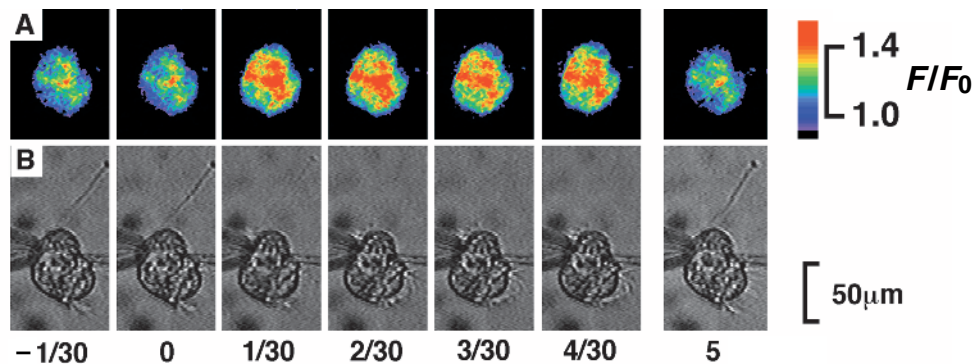

### Discussion

Many authors have reported that glycerol-extracted *Vorticella* contracts when it is bathed in a solution containing  $\text{Ca}^{2+}$  (Hoffmann-Berling, 1958; Townes and Brown, 1965; Weis-Fogh and Amos, 1972; Ochiai *et al.* 1979). They have assumed that an increase in cytosolic  $[\text{Ca}^{2+}]$  is required to activate the contractile system of living *Vorticella*. However, no one has yet succeeded in recording an actual rise in cytosolic  $[\text{Ca}^{2+}]$  in living *Vorticella*, probably because of the difficulty of loading a  $\text{Ca}^{2+}$  indicator into a protozoan cell. In the present experiments, we succeeded in injecting a  $\text{Ca}^{2+}$  indicator (Calcium Green-1 dextran) directly into living *Vorticella* and observing a transient rise in cytosolic  $[\text{Ca}^{2+}]$  in response to mechanical stimulation. The rise in cytosolic  $[\text{Ca}^{2+}]$  was expressed as a series of  $\text{Ca}^{2+}$  images (see Fig. 2). A plot of cytosolic  $[\text{Ca}^{2+}]$  against time clearly shows the time course of the  $\text{Ca}^{2+}$  transient in living *Vorticella* (Fig. 3). The  $\text{Ca}^{2+}$  transient will be called a  $\text{Ca}^{2+}$  spike hereafter.

The relationship between the intensity of the mechanical

stimulus and the peak value of the  $\text{Ca}^{2+}$  spike reveals that the  $\text{Ca}^{2+}$  spike of *Vorticella* is of an all-or-nothing type (Figs 5, 6, 7). This is the first report of an all-or-nothing rise in cytosolic  $[\text{Ca}^{2+}]$  ( $\text{Ca}^{2+}$  spike) in contractile protozoa. Using a giant contractile ciliate *Spirostomum ambiguum*, Etienne (1970) observed a small increase in light emission from a  $\text{Ca}^{2+}$ -sensitive photoprotein, aequorin, which had been injected into the cell. However, it is not known whether the  $\text{Ca}^{2+}$  transient of *Spirostomum* is all-or-nothing in type. Moreover, the time course of the  $\text{Ca}^{2+}$  transient of *Spirostomum* was very different from that of *Vorticella*. The  $\text{Ca}^{2+}$  transient of *Spirostomum* never resembles a  $\text{Ca}^{2+}$  spike.

To examine the causal relationship between the  $\text{Ca}^{2+}$  spike and contraction of the cell body in *Vorticella*, we compared the time course of the onset of the  $\text{Ca}^{2+}$  spike with that of the contraction in the same specimen. As shown in Fig. 4, the time course of the onset of the  $\text{Ca}^{2+}$  spike was similar to that of contraction. Moreover, the threshold intensity of the mechanical stimulus required to evoke a  $\text{Ca}^{2+}$  spike was similar

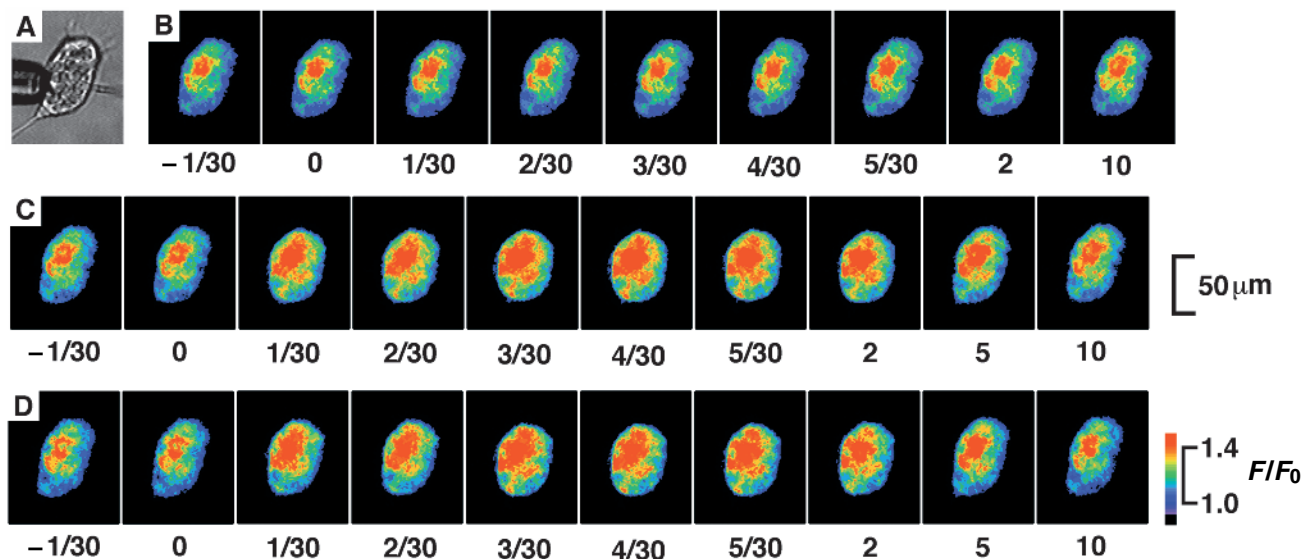

Fig. 5. Cytosolic  $[\text{Ca}^{2+}]$  after mechanical stimuli of different intensities. All the data were recorded from the same specimen. (A) The *Vorticella* cell used for the measurement; (B–D)  $\text{Ca}^{2+}$  images after mechanical stimuli of different intensities. The intensity was 2 V in B, 3 V in C and 10 V in D. Times after applying the mechanical stimuli are labelled (in s) under each image. At time 0, mechanical stimuli were applied to a *Vorticella* cell. Cytosolic  $[\text{Ca}^{2+}]$  is defined in the same way as in Fig. 2. A result typical of five specimens.

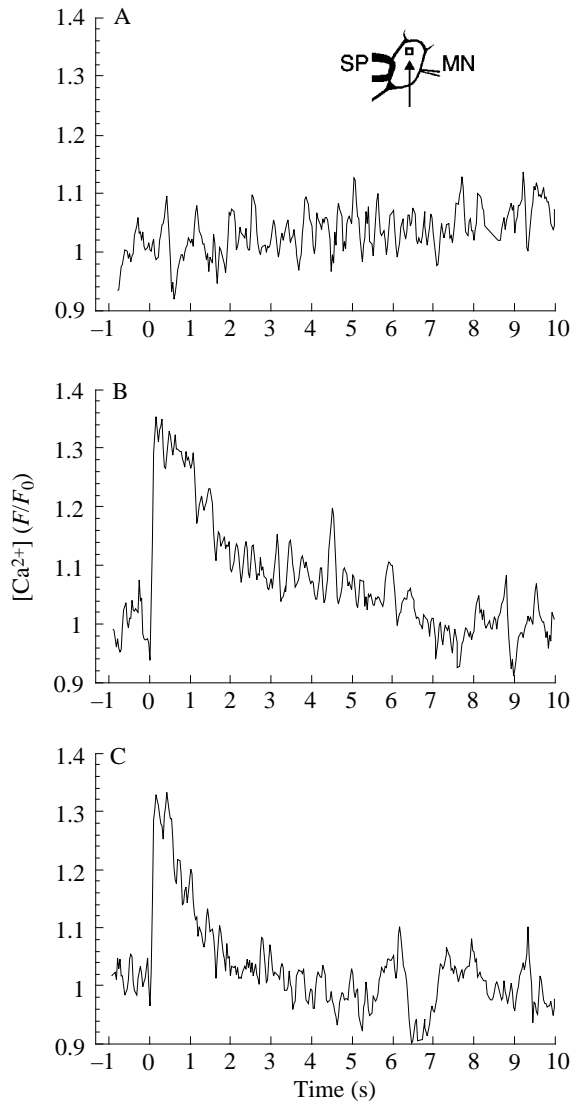

Fig. 6. Time course of Ca<sup>2+</sup> transients evoked by mechanical stimuli of different intensities. At time 0, mechanical stimuli were applied to a *Vorticella* cell. These data were recorded from the same specimen. The intensities of mechanical stimuli were 2 V in A, 3 V in B and 10 V in C. Cytosolic [Ca<sup>2+</sup>] is defined in the same way as in Fig. 2. A result typical of five specimens. Inset, the position of the area of the cell in which cytosolic [Ca<sup>2+</sup>] was measured (shown with an arrow). SP, suction pipette; MN, microneedle.

to that required to evoke cellular contraction. These results support the idea that the Ca<sup>2+</sup> ‘spike’ is responsible for the contraction of *Vorticella*.

Baylor and Hollingworth (1988) reported that the time courses of Ca<sup>2+</sup> transients were prolonged by the fluorescent Ca<sup>2+</sup> indicator loaded into the cell because the fluorescent Ca<sup>2+</sup> indicator acts, more or less, like a Ca<sup>2+</sup> buffer. This may be the reason why the time courses of both the Ca<sup>2+</sup> spike and the contraction in the Calcium-Green-injected *Vorticella* were more prolonged than in normal *Vorticella*.

It is well known that contraction of *Vorticella* occurs even in the absence of extracellular Ca<sup>2+</sup> (Allen 1973a,b; Katoh

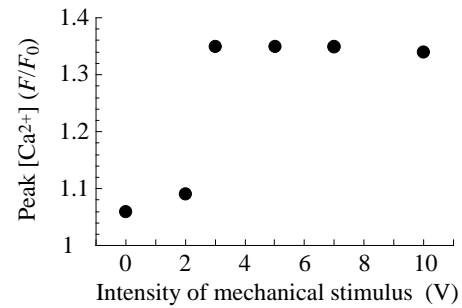

Fig. 7. The relationship between the intensity of the mechanical stimulus and the peak value of the Ca<sup>2+</sup> spike. All these data were recorded from one specimen. An intensity of zero is the resting state in the absence of mechanical stimulation. Cytosolic [Ca<sup>2+</sup>] is defined in the same way as in Fig. 2. A result typically characterizes the responses of five specimens.

and Naitoh, 1992, 1994). In the present experiment, the Ca<sup>2+</sup> spike was recorded in the absence of extracellular Ca<sup>2+</sup>. These results show that Ca<sup>2+</sup> required to evoke the contraction and the Ca<sup>2+</sup> spike is released from some intracellular Ca<sup>2+</sup> storage site(s). Katoh and Naitoh (1992, 1994) suggested that regenerative liberation of Ca<sup>2+</sup> from intracellular storage sites is involved in the increase in cytosolic [Ca<sup>2+</sup>] that evokes all-or-nothing-type contraction. The regenerative liberation of Ca<sup>2+</sup> may be responsible for the all-or-nothing-type Ca<sup>2+</sup> spike in *Vorticella*. Moreton and Amos (1979) proposed that an influx of Ca<sup>2+</sup> from an external solution into the cell, accompanied by a Ca<sup>2+</sup> action potential, might be responsible for the rise in the cytosolic [Ca<sup>2+</sup>] in *Zoothamnium geniculatum*, a close relative of *Vorticella*. However, the mechanism mobilizing Ca<sup>2+</sup> for evoking contraction in *Z. geniculatum* may be different from that in *Vorticella*.

Several authors have reported that endoplasmic reticulum and/or membranous tubules (tubular ER) are present near the myoneme, which is responsible for the contraction of the cell body (Carasso and Favard, 1966; Amos, 1972; Allen, 1973a,b). Ca<sup>2+</sup> was detected in the endoplasmic reticulum and membranous tubules (tubular ER) (Carasso and Favard, 1966). Moreover, Katoh and Naitoh (1994) reported that drugs that affect the liberation of Ca<sup>2+</sup> from the sarcoplasmic reticulum of skeletal muscle fibres (Endo, 1977) also induce or inhibit contraction in living *Vorticella*. Thus, these membranous systems are strong candidates for Ca<sup>2+</sup> storage site(s).

In the present paper, we describe a Ca<sup>2+</sup> spike of all-or-nothing type in living *Vorticella*. We show that release of Ca<sup>2+</sup> from intracellular storage site(s) is responsible for generating the Ca<sup>2+</sup> spike. *Vorticella* may utilize intracellular Ca<sup>2+</sup> storage sites to control cytosolic [Ca<sup>2+</sup>] in a way similar to sarcoplasmic reticulum in muscle cells, although the contractile element of *Vorticella* is very different from that of muscle cells. Our findings are important for understanding the evolution of the Ca<sup>2+</sup> mobilization mechanisms used to evoke cellular contraction in the animal kingdom.

We thank Professor Yukio Hiramoto of University of the Air for invaluable discussions. K.K. is indebted to Dr Mihoko Takahashi of the University of Tsukuba for her invaluable suggestions and expresses sincere thanks to Professor Shinya Inoue of the Marine Biological Laboratory. This work was supported by grants from the Japanese Ministry of Education, Science and Culture (no. 06304004) and from the University of the Air to M.K.

### References

- ALLEN, R. D. (1973a). Structures linking the myonemes, endoplasmic reticulum and surface membranes in the contractile ciliate *Vorticella*. *J. Cell Biol.* **56**, 559–579.
- ALLEN, R. D. (1973b). Contractility and its control in peritrich ciliates. *J. Protozool.* **20**, 25–36.
- AMOS, W. B. (1971). Reversible mechanochemical cycle in the contraction of *Vorticella*. *Nature* **229**, 127–128.
- AMOS, W. B. (1972). Structure and coiling of the stalk in the peritrich ciliates *Vorticella* and *Carchesium*. *J. Cell Sci.* **10**, 95–122.
- AMOS, W. B., ROUTLEDGE, L. M., WEIS-FOGH, T. AND YEW, F. F. (1976). The spasmoneme and calcium-dependent contraction in connection with specific calcium binding proteins. *Symp. Soc. exp. Biol.* **30**, 273–301.
- AMOS, W. B., ROUTLEDGE, L. M. AND YEW, F. F. (1975). Calcium-binding proteins in a vorticellid contractile organelle. *J. Cell Sci.* **19**, 203–213.
- BAYLOR, S. M. AND HOLLINGWORTH, S. (1988). Fura-2 calcium transients in frog skeletal muscle fibres. *J. Physiol., Lond.* **403**, 151–192.
- CARASSO, N. AND FAVARD, P. (1966). Mise en évidence du calcium dans les myonemes pedunculaires de cilies peritriches. *J. Microscopie* **5**, 759–770.
- ENDO, M. (1977). Calcium release from the sarcoplasmic reticulum. *Physiol. Rev.* **57**, 71–108.
- ETTIENNE, E. M. (1970). Control of contractility in *Spirostomum* by dissociated calcium ions. *J. gen. Physiol.* **56**, 168–179.
- HIRAMOTO, Y. (1974). A method of microinjection. *Expl Cell Res.* **87**, 403–406.
- HOFFMANN-BERLING, H. (1958). Der Mechanismus eines neuen, von der Muskelkontraktion verschiedenen Kontraktionszyklus. *Biochim. biophys. Acta* **27**, 247–255.
- KATOH, K. (1995). Transient rise in cytosolic  $Ca^{2+}$  level in response to mechanical stimulation in peritrich ciliate *Vorticella*. *Zool. Sci.* **12**, 119.
- KATOH, K. AND KIKUYAMA, M. (1996). Characteristics of a transient rise in cytosolic  $Ca^{2+}$  level in a contractile protozoan, *Vorticella*. *J. Muscle. Res. Cell Motil.* (in press).
- KATOH, K. AND NAITOH, Y. (1992). A mechanosensory mechanism for evoking a cellular contraction in *Vorticella*. *J. exp. Biol.* **168**, 253–267.
- KATOH, K. AND NAITOH, Y. (1994). Control of cellular contraction by calcium in *Vorticella*. *J. exp. Biol.* **189**, 163–177.
- MORETON, R. B. AND AMOS, W. B. (1979). Electrical recording from the contractile ciliate *Zoothamnium geniculatum* Ayrton. *J. exp. Biol.* **83**, 159–167.
- NAITOH, Y. AND ECKERT, R. (1969). Ionic mechanisms controlling behavioral responses of *Paramecium* to mechanical stimulation. *Science* **164**, 963–965.
- OCHIAI, T., ASAI, H. AND FUKUI, K. (1979). Hysteresis of contraction–extension cycle of glycerinated *Vorticella*. *J. Protozool.* **26**, 420–425.
- OCHIAI, T., KATO, M., OGAWA, T. AND ASAI, H. (1988). Spasmin-like proteins in various ciliates revealed by antibody to purified spasmins of *Carchesium polypinum*. *Experientia* **44**, 768–771.
- PERNBERG, J. AND MACHEMER, H. (1995). Fluorometric measurement of the intracellular free  $Ca^{2+}$ -concentration in the ciliate *Didinium nasutum* using Fura-2. *Cell Calcium* **18**, 484–494.
- ROUTLEDGE, L. M., AMOS, W. B., GUPTA, B. L., HALL, T. A. AND WEIS-FOGH, T. (1975). Microprobe measurements of calcium binding in the contractile spasmoneme of a vorticellid. *J. Cell Sci.* **19**, 195–201.
- SUGI, H. (1960). Propagation of contraction in the stalk muscle of *Carchesium*. *J. Fac. Sci. Univ. Tokyo Sect. IV* **8**, 603–615.
- TOWNES, M. M. AND BROWN, D. E. S. (1965). The involvement of pH, adenosine triphosphate, calcium and magnesium in the contraction of glycerinated stalk of *Vorticella*. *J. cell. comp. Physiol.* **65**, 261–269.
- WEIS-FOGH, T. AND AMOS, W. B. (1972). Evidence of a new mechanism of cell motility. *Nature* **236**, 301–304.
